# Supplementary material for: The influence of interlayer bias and crystal field on the electronic characteristics of twisted tri-layer graphene
Source: Royal Society of Chemistry journal article supplement (doi:10.1039/d5cp00432b), 2025-01-01
Supplement: d5cp00432b1.pdf [file d5cp00432b1.pdf]

## **Supporting Information**

### **The Influence of Interlayer Bias and Crystal Field on the Electronic Characteristics of Twisted Tri-layer Graphene**

Mufasila Mumthaz Muhammed<sup>1</sup> and Junais Habeeb Mekkath<sup>2</sup>

<sup>1</sup>College of Engineering, International University of Kuwait, Ardiya, Kuwait

<sup>2</sup>College of Integrative Studies, Abdullah Al Salem University (AASU), Block 3, Khaldiya, Kuwait

junais.mekkath@aasu.edu.kw



36504 atoms supercell

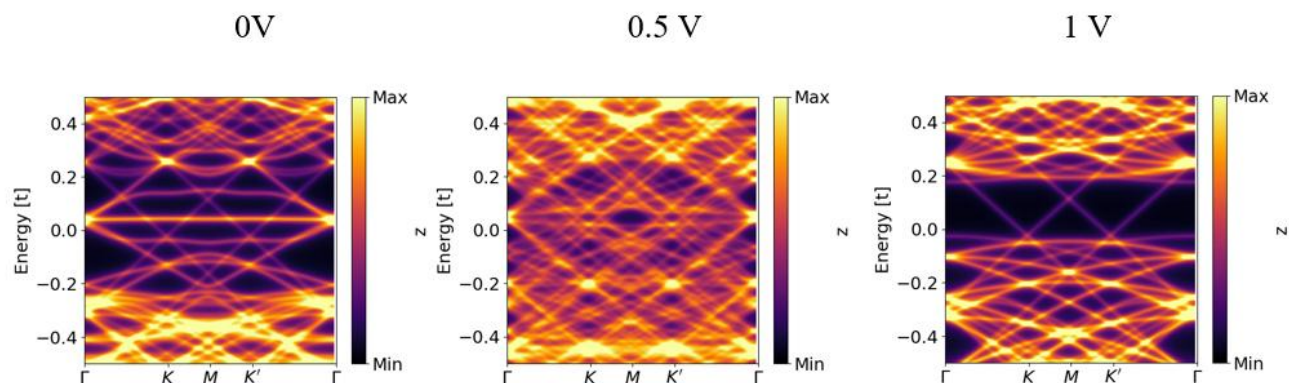

11650 atoms supercell

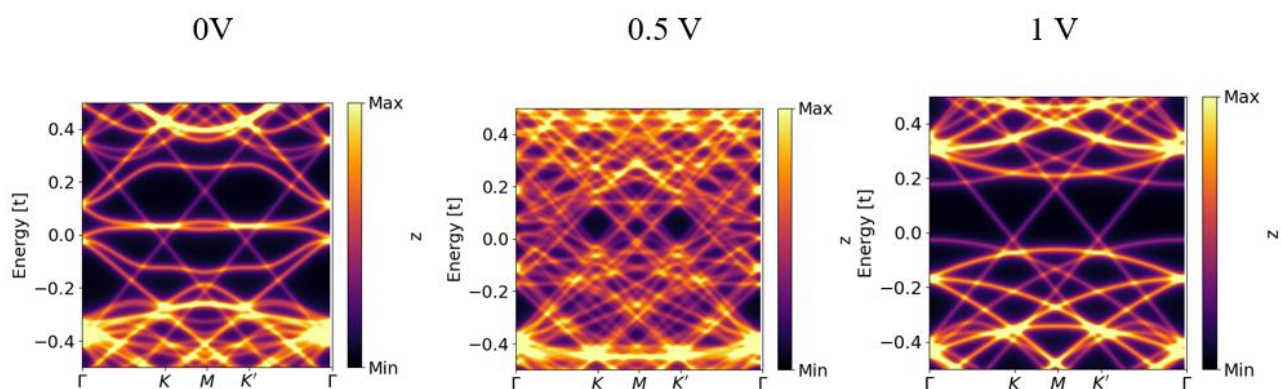

Figure S1: The comparative band structure results for two systems of different sizes considering interlayer bias. It is noticeable that the general trend in band structure evolution (in particular, localized and dispersive bands), as influenced by the interlayer bias, remains largely consistent (albeit with slight variations) as the system size increases.



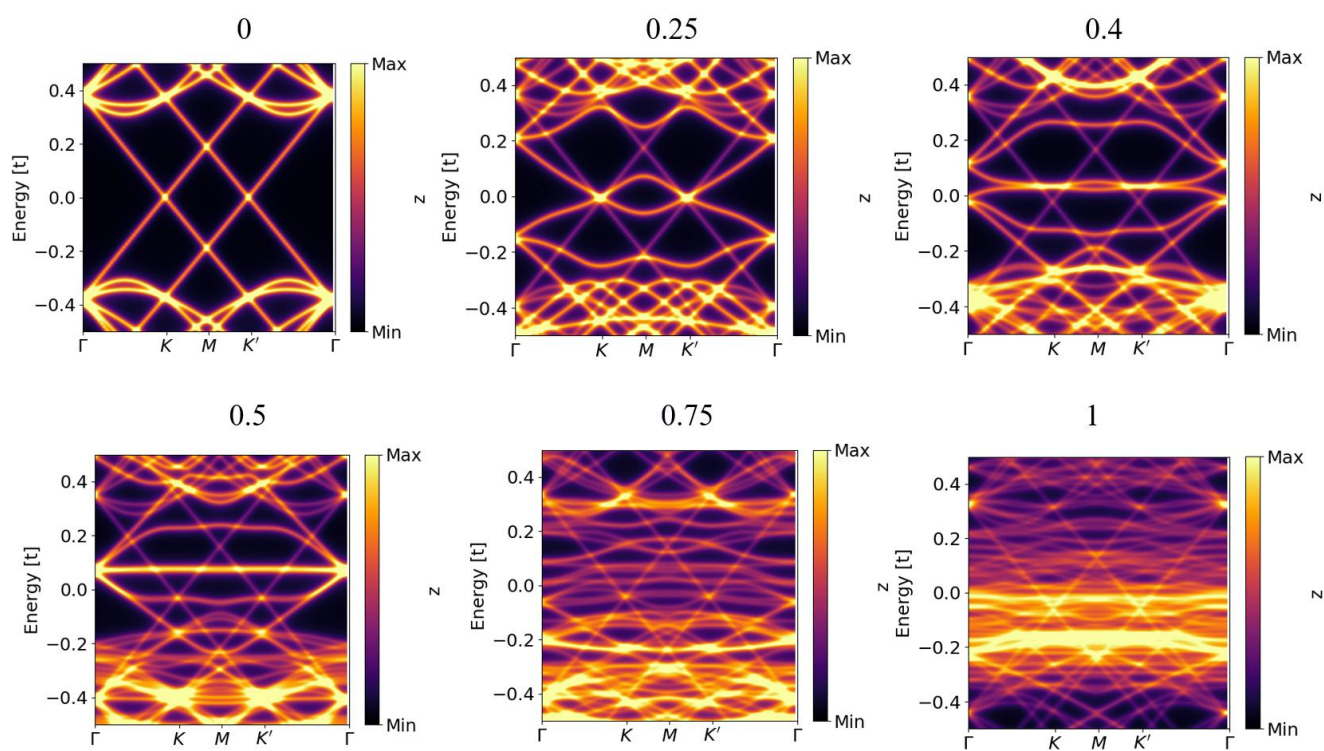

Figure S2: Band structure results depicting variations in interlayer hopping with a zero-interlayer bias. Flat bands emerge for a value of 0.4
